# Supplementary material
Source: Springer Nature journal article supplement (https://www.springermedizin.de/resource/supplementary/12911_2012_685_MOESM2_ESM.pdf/9526396)
Supplement: MOESM2 [file 9526396]

```
scheme://user:pass@example.org:8182/path/to/file;type=foo?name=val#fragm
 \_____/ \_____/ \_____/ \_____/ \_____/ \_____/ \_____/ \_____/
 |       |       |       |       |       |       |       |
scheme  user info hostname port  path filename param  query fragment
              \_____/
              authority
```

Example: `http://www.google.se/search?q=openehr&ie=utf-8&oe=utf-8`
